# Supplementary material
Source: publisher figshare collection journal article supplement (https://frontiersin.figshare.com/ndownloader/files/14064905)
Supplement: Supplementary file [file 14064905]

## Supplementary Material

### Origin of the mobile di-hydro-pterolate synthase gene determining sulfonamide resistance in clinical isolates

Miquel Sánchez-Osuna<sup>1</sup>, Pilar Cortés<sup>1</sup>, Jordi Barbé<sup>1\*</sup>, Ivan Erill<sup>2\*</sup>

\* Correspondence: Corresponding Authors: [jordi.barbe@uab.cat](mailto:jordi.barbe@uab.cat); [erill@umbc.edu](mailto:erill@umbc.edu)

|                                     |                                         |
|-------------------------------------|-----------------------------------------|
| <i>Leptospira santarosai</i>        | VLLNEGITQE-QLIFDPGMGFFLSPDFQVSFEVLRKI   |
| <i>Leptospira interrogans</i>       | ILLNAGIAQE-QLIFDPGMGFFLSSDFQVSFEVLRKI   |
| <i>Leptospira alstonii</i>          | EMLESGISQE-QLIFDPGMGFFLSPDFQISFEVLRKI   |
| <i>Leptospira biflexa</i>           | DLTAMGISSES-SIFFDPGMGFFLSDPMVSFRVLQDL   |
| <i>Sul2 Ecoli 2</i>                 | ALTGAGIKRN-RLVLDPMGFFLGAAPETSLSVLARF    |
| <i>Sul2 Apleuropneumoniae</i>       | ALTGAGIKRN-RLVLDPMGFFLGAAPETSLSVLARF    |
| <i>Sul2 Ecoli 1</i>                 | ALTGAGIKRN-RLVLDPMGFFLGAAPETSLSVLARF    |
| <i>Parvibaculum lavamentivorans</i> | ALEQAGIARA-RVILDPGMGFFVGPPEPETSFSILARL  |
| <i>Candidatus Phaeomarinobacter</i> | GLAASGIARE-RLVLDPMGFFLGTDPVSVLEVLRHV    |
| <i>Sul1 Cglutamicum</i>             | ALRRSGVAAD-RLILDPMGFFLSPAPETSLSHVLSNL   |
| <i>Sul1 Eclocae</i>                 | ALRRSGVAAD-RLILDPMGFFLSPAPETSLSHVLSNL   |
| <i>Sul3 Ecoli</i>                   | ALVEAGVKRE-RIILDPMGFFLGSNPETSILVLKRF    |
| <i>Sul3 SCholeraesuis</i>           | ALVEAGVKRE-RIILDPMGFFLGSNPETSILVLKRF    |
| <i>Chlamydia trachomatis</i>        | QFAQVGLDTSWQVVFDPGIGF--GKTPVQSMMLMDGV   |
| <i>Chlamydia muridarum</i>          | TFAQIGLDTSWQVVFDPGIGF--GKTPVQSMQLMGV    |
| <i>Chlamydomphila caviae</i>        | AFVALGLRQD-QIIFDPGIGF--GTTQIQALNVLHLM   |
| <i>Chlamydia psittaci</i>           | AFVALGLSKD-QIIFDPGIGF--GTTPIQALNVLHLM   |
| <i>Chlamydia felis</i>              | AFTALGLNLD-QIIFDPGIGF--GTSPIQALNVLHLM   |
| <i>Chlamydia avium</i>              | FCDHLGLDCS-QIIFDPGIGF--GTTSIQAMYILQKM   |
| <i>Chlamydia gallinacea</i>         | FCDRLGLDCS-QIIFDPGIGF--GTTSIQAMRIILREM  |
| <i>Chlamydomphila pneumoniae</i>    | MFSDVGLNAN-QVIFDPGIGF--GKGAAQSLATLYEI   |
| <i>Parachlamydia acanthamoebae</i>  | ELKKNVGVKEE-RIILDPMGIGF--GKTVDDNLQIIQNL |
| <i>Waddlia chondrophila</i>         | ALQKAGIKEN-NIIIDPMGIGF--GKTVEDNYQILHNL  |

**Supplementary Data 3** – Detail of the multiple sequence alignment region containing the two-amino acid signature motif including Sul sequences and FolP sequences from members of the *Rhodobiaceae*, the *Leptospiraceae* and the *Chlamydiae*.
